# Supplementary material
Source: PubMed Central journal article supplement (PMC8330956)
Supplement: NIHMS1727971-supplement-SI.pdf [file NIHMS1727971-supplement-SI.pdf]

## Supporting Information

### Screening an established natural product library identifies secondary metabolites that potentiate conventional antibiotics

Anne E. Mattingly<sup>1</sup>, Karlie E. Cox<sup>1</sup>, Richard Smith<sup>2</sup>, Roberta J. Melander<sup>1</sup>, Robert K. Ernst<sup>2</sup>, Christian Melander<sup>1\*</sup>

<sup>1</sup>Department of Chemistry and Biochemistry, University of Notre Dame, Notre Dame, IN 46556 USA

<sup>2</sup>Department of Microbial Pathogenesis, University of Maryland-Baltimore, Baltimore, MD 21201 USA

\*to whom correspondence should be addressed: [cmelande@nd.edu](mailto:cmelande@nd.edu)

#### Contents

|                                                                                                                                                                                                                                                          |    |
|----------------------------------------------------------------------------------------------------------------------------------------------------------------------------------------------------------------------------------------------------------|----|
| Table S1: Re-sensitization of MRSA 1556 to Oxacillin with NCI Natural Product Library Set IV .....                                                                                                                                                       | 2  |
| Table S2: Antibiotic activities of compounds in NCI Natural Products Set IV Plate 13160330. All compounds inhibited growth at a concentration of 20 $\mu$ M in the strains specified. ....                                                               | 3  |
| Table S3: Antibiotic activities of compounds in NCI Natural Products Set IV Plate 13160331.....                                                                                                                                                          | 4  |
| Table S4: Full list of natural products active with colistin in sensitive and resistant strains of <i>A. baumannii</i> and <i>K. pneumoniae</i> .....                                                                                                    | 6  |
| Table S5: Colistin potentiation activity of prodigiosin, obatoclax, rifampicin, and novobiocin in additional strains of colistin-resistant <i>A. baumannii</i> and <i>K. pneumoniae</i> .....                                                            | 9  |
| Table S6: Fold-change differences in the lowest effective concentration of novobiocin or prodigiosin concentration required to potentiate colistin in <i>A. baumannii</i> 4106 and <i>K. pneumoniae</i> B9 upon the addition of fetal bovine serum ..... | 10 |
| Table S7: Minimum inhibitory concentrations of novobiocin and prodigiosin in the presence of the membrane-permeabilizing polymyxin B nonpeptide (PMBN) at 2, 4, and 8 $\mu$ g/mL .....                                                                   | 11 |
| Figure S1: Checkerboard assays for colistin with prodigiosin, obatoclax, rifampicin, or novobiocin in <i>A. baumannii</i> 4106. ....                                                                                                                     | 12 |
| Figure S2: Checkerboard assays for colistin with prodigiosin, obatoclax, rifampicin, or novobiocin in <i>K. pneumoniae</i> B9 .....                                                                                                                      | 13 |
| Table S8: Fractional inhibitory concentration indices (FICI) for antibiotic/adjuvant combination in <i>A. baumannii</i> 4106 and <i>K. pneumoniae</i> B9.....                                                                                            | 14 |
| Figure S3: Growth curves of <i>Klebsiella pneumoniae</i> B9. ....                                                                                                                                                                                        | 15 |
| Figure S4: m/z shifts in lipid A composition of an untreated <i>K. pneumoniae</i> B9 control (A) compared to cells treated with 10 $\mu$ M novobiocin (B) or 5 $\mu$ M prodigiosin (C). ....                                                             | 16 |
| Figure S5: DCFH-DA fluorescence assay of <i>K. pneumoniae</i> B9 cells treated with hydrogen peroxide and colistin. ....                                                                                                                                 | 17 |

**Table S1: Re-sensitization of MRSA 1556 to Oxacillin with NCI Natural Product Library Set IV**

|                       | Compound Name                                                                                                                   | Oxacillin MIC ( $\mu\text{g}/\text{mL}$ ) |
|-----------------------|---------------------------------------------------------------------------------------------------------------------------------|-------------------------------------------|
| <b>Control</b>        | -                                                                                                                               | 32                                        |
| <b>Plate 13160330</b> |                                                                                                                                 |                                           |
| <b>D8</b>             | Fastigilin B                                                                                                                    | 8 (4)                                     |
| <b>E12</b>            | Michellamine B diacetic acid salt                                                                                               | 2* (16)                                   |
| <b>F13</b>            | Cryptopimaric acid                                                                                                              | 2* (16)                                   |
| <b>G9</b>             | (7AR-CIS)-7A,12A-DIHYDRO-13-METHOXY-3,3-DIMETHYL-11-(3-METHYL-2-BUTENYL)-3H,7H-BENZOFURO[3,2-C]PYRANO[3,2-G][1]BENZOPYRAN-10-OL | 2* (16)                                   |
| <b>G16</b>            | Cinerubin A                                                                                                                     | 8 (4)                                     |
| <b>H8</b>             | Staphylomycin S                                                                                                                 | 8 (4)                                     |
| <b>I3</b>             | Pomiferin                                                                                                                       | 8 (4)                                     |
| <b>L7</b>             | Vumon                                                                                                                           | 8 (4)                                     |
| <b>N10</b>            | Chaetochromin                                                                                                                   | 8 (4)                                     |
| <b>Plate 13160331</b> |                                                                                                                                 |                                           |
| <b>C3</b>             | Shodomycin                                                                                                                      | 8 (4)                                     |
| <b>C4</b>             | Doxyppyromycin hydrochloride                                                                                                    | 8 (4)                                     |
| <b>D12</b>            | Albacarcin V                                                                                                                    | 4 (8)                                     |
| <b>G9</b>             | Prodiginine HCl                                                                                                                 | 8 (4)                                     |
| <b>H4</b>             | Lomofungin                                                                                                                      | 8 (4)                                     |
| <b>I11</b>            | Sirodesmin A                                                                                                                    | 2* (16)                                   |
| <b>L16</b>            | Variabiline dyhydrochloride                                                                                                     | 2* (16)                                   |

Natural products were tested at 20  $\mu\text{M}$ . Fold-change as compared to the control oxacillin MIC is expressed in parenthesis. \* indicates the lowest oxacillin concentration tested.

**Table S2: Antibiotic activities of compounds in NCI Natural Products Set IV Plate 13160330. All compounds inhibited growth at a concentration of 20  $\mu$ M in the strains specified.**

| WELL ID | NSC    | COMPOUND NAME              | PUBCHEM SID      | BACTERIAL STRAIN OF OBSERVED ACTIVITY                                           |
|---------|--------|----------------------------|------------------|---------------------------------------------------------------------------------|
| C08     | 133100 | Rifamycin sodium salt      | 558026           | MRSA 1556                                                                       |
| D06     | 71795  | Ellipticine                | 26732720         | MRSA 1556                                                                       |
| E04     | 13252  | Aureomycin                 | 540479           | <i>A. baumannii</i> 5075<br><i>A. baumannii</i> 4106<br><i>K. pneumoniae</i> B9 |
| E05     | 31867  | Decarboxy-norlobaric acid  | 90601            | MRSA 1556                                                                       |
| E08     | 145118 | Lankacidin C               | 559683           | MRSA 1556                                                                       |
| F08     | 177406 | Antibiotic X-536A          | 446199           | MRSA 1556                                                                       |
| F16     | 19990  | Streptovaricin C           | 82709, 26664290  | MRSA 1556                                                                       |
| F20     | 56410  | Porfiromycin               | 105809, 26732566 | MRSA 1556<br><i>K. pneumoniae</i> B9                                            |
| G03     | 3053   | Dactinomycin D             | 538571           | MRSA 1556                                                                       |
| G20     | 47147  | Prodigiosin                | 26732718         | MRSA 1556<br><i>A. baumannii</i> 4106                                           |
| H09     | 285116 | Siomycin A                 | 571338, 92764142 | MRSA 1556                                                                       |
| I10     | 325014 | Bactobolin                 | 457886, 92763388 | MRSA 1556                                                                       |
| I21     | 69187  | 9-Methoxyellipticine       | 113202, 26666180 | MRSA 1556                                                                       |
| J05     | 45383  | Streptonigrin              | 99123, 26732715  | MRSA 1556<br><i>A. baumannii</i> 5075<br><i>K. pneumoniae</i> B9                |
| J06     | 82151  | Daunorubicin hydrochloride | 301154           | MRSA 1556                                                                       |
| K21     | 70931  | Celastrol                  | 114102, 92763934 | MRSA 1556                                                                       |
| L09     | 292567 | Nigericin sodium salt      | 572042           | MRSA 1556                                                                       |
| L20     | 59729  | Sparsomycin                | 107825           | MRSA 1556                                                                       |
| M04     | 22842  | Cumostrol                  | 84879, 26732716  | MRSA 1556                                                                       |
| N04     | 30552  | Mangostin                  | 89727            | MRSA 1556                                                                       |

**Table S3: Antibiotic activities of compounds in NCI Natural Products Set IV Plate 13160331.** All compounds inhibited growth at 20  $\mu$ M in the strains specified

| WELL ID | NSC    | NAME                                               | PUBCHEM SID          | BACTERIAL STRAIN OF OBSERVED ACTIVITY                                                        |
|---------|--------|----------------------------------------------------|----------------------|----------------------------------------------------------------------------------------------|
| C09     | 237671 | Actinomycin X4357g - methoxime                     | 567819               | MRSA 1556                                                                                    |
| C14     | 526417 | Levomycin                                          | 580231,<br>92763358  | MRSA 1556<br><i>A. baumannii</i> 5075<br><i>A. baumannii</i> 4106<br><i>K. pneumoniae</i> B9 |
| C15     | 785154 | Dehydronuciferine                                  | --                   | MRSA 1556                                                                                    |
| D07     | 156219 | Streptovaricin G                                   | 434167,<br>26732585  | MRSA 1556                                                                                    |
| E14     | 785143 | Subsessiline                                       | --                   | MRSA 1556                                                                                    |
| F06     | 136044 | Rhodomyacin A                                      | 558415               | MRSA 1556                                                                                    |
| F08     | 208734 | Aclarubicin                                        | 125750               | MRSA 1556                                                                                    |
| F14     | 785149 | O-Methylmoschatoline                               | --                   | MRSA 1556                                                                                    |
| G07     | 145612 | Rifamycin, 3-<br>[[dimethylamino)methyl]-<br>(9Cl) | 559725               | MRSA 1556                                                                                    |
| G10     | 269146 | Variamycin                                         | 301230,<br>92763436  | MRSA 1556                                                                                    |
| H06     | 138320 | Dianemycin                                         | 558614,<br>92764026  | MRSA 1556                                                                                    |
| H10     | 276382 | Pepleomycin Sulfate                                | 301234               | MRSA 1556                                                                                    |
| I04     | 102816 | 5-Azacytidine                                      | 405114               | <i>K. pneumoniae</i> 2146                                                                    |
| I08     | 179834 | Withanolide E                                      | 446985               | MRSA 1556<br><i>A. baumannii</i> 5075<br><i>A. baumannii</i> 4106                            |
| I09     | 248605 | Julimycin B2                                       | 568775,<br>92764128  | MRSA 1556                                                                                    |
| J04     | 107041 | Scopafungin                                        | --                   | MRSA 1556                                                                                    |
| K12     | 343256 | Stubomycin                                         | 461879,<br>121283285 | MRSA 1556                                                                                    |
| L08     | 227186 | Chlorobiocin                                       | 131861,<br>26664947  | MRSA 1556<br><i>A. baumannii</i> 5075<br><i>A. baumannii</i> 4106                            |
| L13     | 256942 | 4'-Epiadriamycin                                   | 569372,<br>92764132  | MRSA 1556                                                                                    |

| WELL ID | NSC    | NAME                             | PUBCHEM SID | BACTERIAL STRAIN OF OBSERVED ACTIVITY |
|---------|--------|----------------------------------|-------------|---------------------------------------|
| M08     | 184398 | Aquayamycin                      | 447441      | MRSA 1556                             |
| M16     | 785171 | 7-<br>Benzoyldehydronuciferine   | --          | MRSA 1556                             |
| N07     | 170365 | Thiactin                         | 563007      | MRSA 1556                             |
| N15     | 785165 | Variabiline<br>monohydrochloride | --          | MRSA 1556                             |

**Table S4: Full list of natural products active with colistin in sensitive and resistant strains of *A. baumannii* and *K. pneumoniae*.** Natural products were tested at 20  $\mu$ M. Fold-change as compared to the control antibiotic MIC is expressed in parenthesis. \* Indicates the lowest antibiotic concentration tested.

|                | Compound Name                                                                                                                                                                 | Colistin MIC ( $\mu$ g/mL)  |                             |                              |                            |
|----------------|-------------------------------------------------------------------------------------------------------------------------------------------------------------------------------|-----------------------------|-----------------------------|------------------------------|----------------------------|
|                |                                                                                                                                                                               | <i>A. baumannii</i><br>5075 | <i>A. baumannii</i><br>4106 | <i>K. pneumoniae</i><br>2146 | <i>K. pneumoniae</i><br>B9 |
| Control        | -                                                                                                                                                                             | 1                           | 1024                        | 1                            | 512                        |
| Plate 13160330 |                                                                                                                                                                               |                             |                             |                              |                            |
| C8             | rifamycin sodium salt                                                                                                                                                         | 0.125 (8)                   | -                           | -                            | 4 (128)                    |
| C9             | Rapamycin                                                                                                                                                                     | 0.25 (4)                    | -                           | -                            | -                          |
| D6             | Ellipticine                                                                                                                                                                   | 0.125 (8)                   | -                           | -                            | 4 (128)                    |
| E5             | Decarboxy-norlobaric acid                                                                                                                                                     | -                           | -                           | -                            | 32 (16)                    |
| E21            | Erythromycin<br>cyclopentylpropionate                                                                                                                                         | -                           | -                           | 0.25 (4)                     | -                          |
| F7             | valinomycin                                                                                                                                                                   | 0.125 (8)                   | -                           | 0.25 (4)                     | -                          |
| F8             | antibiotic X-536A                                                                                                                                                             | -                           | -                           | -                            | 32 (16)                    |
| F13            | Cryptopimaric acid                                                                                                                                                            | -                           | -                           | -                            | 64 (8)                     |
| F16            | Streptovaricin C                                                                                                                                                              | -                           | -                           | -                            | 1* (512)                   |
| F20            | Porfiromycin                                                                                                                                                                  | -                           | 256 (4)                     | -                            | -                          |
| G3             | Dactinomycin D                                                                                                                                                                | 0.25 (4)                    | -                           | -                            | -                          |
| G9             | (7 $\alpha$ -cis)-7 $\alpha$ ,12 $\alpha$ -dihydro-<br>13-methoxy-3,3-dimethyl-<br>11-(3-methyl-2-butenyl)-<br>3h,7h-benzofuro[3,2-<br>c]pyrano[3,2-<br>g][1]benzopyran-10-ol | 0.25 (4)                    | -                           | -                            | -                          |
| G10            | Lonchocarpic acid                                                                                                                                                             | -                           | -                           | -                            | 32 (16)                    |
| G20            | Prodigiosin                                                                                                                                                                   | 0.125 (8)                   | -                           | 0.25 (4)                     | 2 (256)                    |
| H9             | Siomycin A                                                                                                                                                                    | 0.25 (4)                    | -                           | -                            | -                          |

|                | Compound Name                                      | Colistin MIC ( $\mu\text{g}/\text{mL}$ ) |                             |                              |                            |
|----------------|----------------------------------------------------|------------------------------------------|-----------------------------|------------------------------|----------------------------|
|                |                                                    | <i>A. baumannii</i><br>5075              | <i>A. baumannii</i><br>4106 | <i>K. pneumoniae</i><br>2146 | <i>K. pneumoniae</i><br>B9 |
| Control        | -                                                  | 1                                        | 1024                        | 1                            | 512                        |
| I21            | Methoxyelliptione                                  | -                                        | 64 (16)                     | -                            | -                          |
| J6             | Daunorubicin hydrochloride                         | -                                        | -                           | -                            | 32 (16)                    |
| K21            | Celastrol                                          | -                                        | 64 (16)                     | -                            | 4 (128)                    |
| L9             | Nigericin sodium salt                              | 0.125 (8)                                | 64 (16)                     | -                            | 2 (256)                    |
| M4             | Cumostrol                                          | -                                        | 256 (4)                     | -                            | 32 (16)                    |
| M8             | Streptoal C                                        | -                                        | -                           | -                            | 32 (16)                    |
| N4             | Mangostin                                          | 0.25 (4)                                 | 128 (8)                     | -                            | 4 (128)                    |
| N5             | Carbomycin                                         | 0.25 (4)                                 | 64 (16)                     | -                            | 1* (512)                   |
| Plate 13160331 |                                                    |                                          |                             |                              |                            |
| C4             | Aklavin hydrochloride                              | 0.25 (4)                                 | -                           | -                            | 32 (16)                    |
| C9             | Actinomycin X4357g -<br>methoxime                  | 0.25 (4)                                 | -                           | 0.25 (4)                     | -                          |
| C15            | Dehydronuciferine                                  | -                                        | 256 (4)                     | -                            | -                          |
| D7             | Streptovaricin G                                   | 0.125 (8)                                | 2* (512)                    | -                            | 2* (256)                   |
| D9             | 19-Formylgeldanamycin N-<br>morpholinoimine        | -                                        | -                           | 0.25 (4)                     | -                          |
| E14            | Subsessiline                                       | -                                        | 256 (4)                     | -                            | -                          |
| F4             | Centaureidin                                       | 0.25 (4)                                 | -                           | -                            | -                          |
| F6             | Rhodomycin A                                       | 0.25 (4)                                 | 64 (16)                     | 0.25 (4)                     | 32 (16)                    |
| F8             | Aclarubicin                                        | 0.25 (4)                                 | 128 (8)                     | 0.125 (8)                    | 4 (128)                    |
| F14            | O-Methylmoschatoline                               | -                                        | 256 (4)                     | -                            | -                          |
| G3             | Aromoline                                          | 0.25 (4)                                 | -                           | -                            | -                          |
| G7             | Rifamycin, 3-<br>[(dimethylamino)methyl]-<br>(9Cl) | 0.25 (4)                                 | 2* (512)                    | -                            | 2* (256)                   |

|         | Compound Name                 | Colistin MIC ( $\mu\text{g/mL}$ ) |                     |                      |                      |
|---------|-------------------------------|-----------------------------------|---------------------|----------------------|----------------------|
|         |                               | <i>A. baumannii</i>               | <i>A. baumannii</i> | <i>K. pneumoniae</i> | <i>K. pneumoniae</i> |
|         |                               | 5075                              | 4106                | 2146                 | B9                   |
| Control | -                             | 1                                 | 1024                | 1                    | 512                  |
| G9      | Prodiginine HCl               | 0.125 (8)                         | 64 (16)             | 0.25 (4)             | 4 (128)              |
| G10     | Variamycin                    | 0.25 (4)                          | -                   | -                    | -                    |
| H6      | Dianemycin                    | 0.0625* (16)                      | 64 (16)             | 0.0625* (16)         | 4 (128)              |
| H8      | Borrelidin                    | 0.25 (4)                          | 2* (512)            | -                    | 2* (256)             |
| H10     | Pepleomycin Sulfate           | 0.125 (8)                         | 4 (256)             | -                    | 2* (256)             |
| H12     | Rebeccamycin                  | 0.25 (4)                          | -                   | -                    | -                    |
| I8      | Withanolide E                 | -                                 | -                   | 0.25 (4)             | 2* (256)             |
| I9      | Julimycin B2                  | 0.25 (4)                          | 64 (16)             | 0.25 (4)             | 32 (16)              |
| I11     | Sirodesmin A                  | -                                 | -                   | -                    | 32 (16)              |
| J4      | Scopafungin                   | 0.125 (8)                         | -                   | 0.0625* (16)         | -                    |
| K12     | Stubomycin                    | -                                 | 64 (16)             | -                    | 2* (256)             |
| L8      | Clorobiocin                   | -                                 | -                   | -                    | 2* (256)             |
| L15     | Roemarine hydrochloride       | 0.25 (4)                          | -                   | -                    | -                    |
| L16     | Variabiline dihydrochloride   | 0.125 (8)                         | 256 (4)             | -                    | -                    |
| M8      | Aquayamycin                   | -                                 | -                   | -                    | 64 (8)               |
| N7      | Thiactin                      | 0.125 (8)                         | 4 (256)             | 0.25 (4)             | -                    |
| N15     | Variabiline monohydrochloride | 0.125 (8)                         | 128 (8)             | 0.0625* (16)         | -                    |



**Table S5: Colistin potentiation activity of prodigiosin, obatoclax, rifampicin, and novobiocin in additional strains of colistin-resistant *A. baumannii* and *K. pneumoniae***

| Bacterial Strain                  | <i>A. baumannii</i>           |       |        |       | <i>K. pneumoniae</i> |        |
|-----------------------------------|-------------------------------|-------|--------|-------|----------------------|--------|
|                                   | 3941                          | 3942  | 4112   | 4119  | C3                   |        |
| Colistin MIC*                     | 512                           | 512   | 1024   | 1024  | 1024                 |        |
| Prodigiosin MIC ( $\mu\text{M}$ ) | 10                            | 20    | 10     | 160   | > 160                |        |
| Lowest Effective Concentration    | Prodigiosin ( $\mu\text{M}$ ) | 5     | 5      | 5     | 5                    | 10     |
|                                   | Colistin MIC*                 | 2     | 4      | 4     | 8                    | 0.25   |
|                                   | (Fold-Reduction)              | (256) | (128)  | (256) | (128)                | (4096) |
| Obatoclax MIC ( $\mu\text{M}$ )   | > 160                         | > 160 | > 160  | > 160 | > 160                |        |
| Lowest Effective Concentration    | Obatoclax ( $\mu\text{M}$ )   | 20    | 20     | 20    | 20                   | 5      |
|                                   | Colistin MIC*                 | 4     | 8      | 4     | 8                    | 4      |
|                                   | (Fold-Reduction)              | (128) | (64)   | (256) | (128)                | (256)  |
| Rifampicin MIC ( $\mu\text{M}$ )  | 2.5                           | 2.5   | 1.25   | 1.25  | 40                   |        |
| Lowest Effective Concentration    | Rifampicin ( $\mu\text{M}$ )  | 0.156 | 0.3125 | 0.156 | 5                    | 0.156  |
|                                   | Colistin MIC*                 | 2     | 2      | 8     | 8                    | 4      |
|                                   | (Fold-Reduction)              | (256) | (256)  | (128) | (128)                | (256)  |
| Novobiocin MIC ( $\mu\text{M}$ )  | 20                            | 20    | 20     | 20    | 40                   |        |
| Lowest Effective Concentration    | Novobiocin ( $\mu\text{M}$ )  | 5     | 5      | 5     | 5                    | 0.625  |
|                                   | Colistin MIC*                 | 2     | 2      | 2     | 0.5                  | 2      |
|                                   | (Fold-Reduction)              | (256) | (256)  | (512) | (2048)               | (512)  |

**Table S6: Fold-change differences in the lowest effective concentration of novobiocin or prodigiosin concentration required to potentiate colistin in *A. baumannii* 4106 and *K. pneumoniae* B9 upon the addition of fetal bovine serum.**

|                                | <i>A. baumannii</i> 4106 |         |         | <i>K. pneumoniae</i> B9 |         |         |
|--------------------------------|--------------------------|---------|---------|-------------------------|---------|---------|
|                                | 5% FBS                   | 10% FBS | 20% FBS | 5% FBS                  | 10% FBS | 20% FBS |
| 2 µg/mL colistin + Novobiocin  | 2                        | 2       | 4       | 1                       | 1       | 1       |
| 2 µg/mL colistin + Prodigiosin | 1                        | 2       | 2       | 0.25                    | 1       | 0.5     |

**Table S7: Minimum inhibitory concentrations of novobiocin and prodigiosin in the presence of the membrane-permeabilizing polymyxin B nonpeptide (PMBN) at 2, 4, and 8 µg/mL.**

|                           | Novobiocin MIC (µM)  |              |              |              |
|---------------------------|----------------------|--------------|--------------|--------------|
|                           | 0 µg/ml PMBN         | 2 µg/ml PMBN | 4 µg/ml PMBN | 8 µg/ml PMBN |
| <i>A. baumannii</i> 5075  | >20                  | 2.5          | 1.25         | 2.5          |
| <i>A. baumannii</i> 4106  | 20                   | 20           | 20           | 20           |
| <i>K. pneumoniae</i> 2146 | >20                  | >20          | >20          | 20           |
| <i>K. pneumoniae</i> B9   | >20                  | >20          | >20          | >20          |
|                           | Prodigiosin MIC (µM) |              |              |              |
|                           | 0 µg/ml PMBN         | 2 µg/ml PMBN | 4 µg/ml PMBN | 8 µg/ml PMBN |
| <i>A. baumannii</i> 5075  | >20                  | >20          | >20          | 10           |
| <i>A. baumannii</i> 4106  | 20                   | 20           | 20           | 10           |
| <i>K. pneumoniae</i> 2146 | >20                  | >20          | >20          | 20           |
| <i>K. pneumoniae</i> B9   | >20                  | >20          | >20          | >20          |

|                  |      | Prodigiosin (μM) |     |     |      |      |      |      |       |        |         |       |
|------------------|------|------------------|-----|-----|------|------|------|------|-------|--------|---------|-------|
|                  |      | 80               | 40  | 20  | 10   | 5    | 2.5  | 1.25 | 0.625 | 0.3125 | 0.15625 | 0     |
| Colistin (μg/mL) | 16   | 3.8              | 1.1 | 0.4 | 0.2  | 0.0  | 39.4 | 67.7 | 68.7  | 72.7   | 73.8    | 73.7  |
|                  | 8    | 3.7              | 1.0 | 0.3 | 0.0  | 1.2  | 67.1 | 74.1 | 76.3  | 82.4   | 83.9    | 84.5  |
|                  | 4    | 4.2              | 1.0 | 0.3 | 0.0  | 24.6 | 77.8 | 82.4 | 85.6  | 90.1   | 92.0    | 92.4  |
|                  | 2    | 4.2              | 1.4 | 0.3 | 0.8  | 53.3 | 84.9 | 84.1 | 89.9  | 92.4   | 94.6    | 95.5  |
|                  | 1    | 4.1              | 1.0 | 0.4 | 0.7  | 69.1 | 88.9 | 87.5 | 90.8  | 94.6   | 96.4    | 98.8  |
|                  | 0.5  | 3.8              | 0.9 | 0.3 | 2.5  | 81.7 | 91.5 | 91.5 | 93.8  | 96.7   | 99.3    | 101.7 |
|                  | 0.25 | 3.6              | 0.8 | 0.2 | 14.3 | 88.0 | 96.2 | 95.0 | 96.5  | 99.4   | 101.5   | 103.9 |
|                  | 0    | 5.0              | 3.5 | 6.6 | 56.3 | 97.3 | 95.7 | 92.4 | 94.0  | 98.2   | 98.0    | 100.0 |

  

|                  |      | Obatoclox (μM) |       |       |       |      |       |       |       |        |         |       |
|------------------|------|----------------|-------|-------|-------|------|-------|-------|-------|--------|---------|-------|
|                  |      | 80             | 40    | 20    | 10    | 5    | 2.5   | 1.25  | 0.625 | 0.3125 | 0.15625 | 0     |
| Colistin (μg/mL) | 16   | 15.4           | 5.1   | 2.0   | 1.3   | 0.3  | 26.7  | 82.1  | 81.6  | 83.1   | 81.3    | 81.0  |
|                  | 8    | 13.7           | 6.2   | 1.8   | 1.0   | 3.0  | 65.8  | 85.8  | 88.4  | 89.5   | 88.9    | 86.8  |
|                  | 4    | 11.6           | 4.9   | 2.8   | 3.0   | 35.7 | 81.8  | 94.3  | 96.7  | 97.3   | 96.6    | 95.0  |
|                  | 2    | 9.8            | 7.1   | 15.5  | 31.2  | 74.2 | 89.0  | 99.0  | 99.3  | 99.6   | 99.1    | 97.8  |
|                  | 1    | 20.0           | 31.7  | 63.9  | 75.9  | 90.1 | 97.1  | 101.7 | 102.4 | 102.2  | 101.7   | 101.1 |
|                  | 0.5  | 60.9           | 93.0  | 94.7  | 92.8  | 95.4 | 98.3  | 101.8 | 102.5 | 102.5  | 102.2   | 101.5 |
|                  | 0.25 | 84.9           | 109.3 | 103.4 | 97.5  | 98.7 | 101.5 | 102.5 | 103.1 | 103.7  | 104.3   | 104.1 |
|                  | 0    | 107.1          | 134.1 | 107.8 | 102.1 | 97.6 | 96.7  | 97.9  | 99.9  | 97.8   | 98.8    | 100.0 |

  

|                  |      | Rifampicin (μM) |     |     |     |      |       |        |         |          |          |       |
|------------------|------|-----------------|-----|-----|-----|------|-------|--------|---------|----------|----------|-------|
|                  |      | 20              | 10  | 5   | 2.5 | 1.25 | 0.625 | 0.3125 | 0.15625 | 0.078125 | 0.039063 | 0     |
| Colistin (μg/mL) | 16   | 1.0             | 1.0 | 0.7 | 0.5 | 0.3  | 0.2   | 0.4    | 0.5     | 32.2     | 68.6     | 78.2  |
|                  | 8    | 1.1             | 0.9 | 0.7 | 0.5 | 0.5  | 0.5   | 0.4    | 26.6    | 70.2     | 84.6     | 88.1  |
|                  | 4    | 1.3             | 1.1 | 0.8 | 0.7 | 0.6  | 0.5   | 14.4   | 57.0    | 88.0     | 92.5     | 97.5  |
|                  | 2    | 1.1             | 1.1 | 0.6 | 0.7 | 0.8  | 3.7   | 43.5   | 87.8    | 93.9     | 95.7     | 100.3 |
|                  | 1    | 1.3             | 0.9 | 0.7 | 0.7 | 0.3  | 34.6  | 84.3   | 92.8    | 97.7     | 99.9     | 101.9 |
|                  | 0.5  | 1.2             | 0.8 | 0.5 | 0.3 | 10.2 | 66.8  | 90.4   | 95.7    | 100.2    | 102.1    | 103.5 |
|                  | 0.25 | 0.9             | 0.9 | 0.5 | 0.3 | 39.2 | 81.8  | 90.3   | 93.5    | 98.6     | 99.3     | 102.3 |
|                  | 0    | 0.9             | 0.9 | 0.8 | 0.6 | 64.9 | 86.8  | 89.2   | 90.7    | 94.4     | 97.4     | 100.0 |

  

|                  |      | Novobiocin (μM) |     |      |      |      |      |       |        |         |          |       |
|------------------|------|-----------------|-----|------|------|------|------|-------|--------|---------|----------|-------|
|                  |      | 40              | 20  | 10   | 5    | 2.5  | 1.25 | 0.625 | 0.3125 | 0.15625 | 0.078125 | 0     |
| Colistin (μg/mL) | 16   | 0.7             | 0.9 | 1.0  | 1.1  | 1.1  | 29.1 | 68.3  | 78.0   | 81.4    | 78.7     | 77.3  |
|                  | 8    | 0.8             | 0.9 | 1.0  | 1.1  | 1.5  | 57.3 | 81.0  | 84.3   | 87.0    | 83.7     | 84.2  |
|                  | 4    | 1.0             | 1.1 | 1.1  | 1.2  | 5.7  | 80.7 | 90.5  | 92.5   | 93.0    | 93.1     | 92.8  |
|                  | 2    | 0.9             | 1.0 | 1.2  | 1.2  | 42.6 | 89.7 | 94.8  | 95.6   | 95.9    | 95.7     | 95.4  |
|                  | 1    | 0.8             | 1.0 | 1.1  | 3.0  | 84.9 | 94.3 | 96.2  | 96.5   | 96.4    | 97.2     | 97.4  |
|                  | 0.5  | 0.7             | 0.7 | 0.3  | 59.7 | 92.6 | 96.6 | 97.4  | 99.0   | 99.5    | 100.1    | 100.7 |
|                  | 0.25 | 0.0             | 0.3 | 0.6  | 83.2 | 95.5 | 99.3 | 99.9  | 100.3  | 101.4   | 102.2    | 101.8 |
|                  | 0    | 0.0             | 0.3 | 75.4 | 89.6 | 94.3 | 96.6 | 95.5  | 97.5   | 95.7    | 95.9     | 100.0 |

**Figure S1: Checkerboard assays for colistin with prodigiosin, obatoclox, rifampicin, or novobiocin in *A. baumannii* 4106.** Cells in black indicate < 10% growth compared to the untreated control well as determined by OD600 measured on a Synergy HTX Multimode plate reader

|                  |      | Prodigiosin (μM) |      |      |      |      |       |      |       |        |         |       |
|------------------|------|------------------|------|------|------|------|-------|------|-------|--------|---------|-------|
|                  |      | 80               | 40   | 20   | 10   | 5    | 2.5   | 1.25 | 0.625 | 0.3125 | 0.15625 | 0     |
| Colistin (μg/mL) | 16   | 2.2              | 0.8  | 0.3  | 0.1  | 0.0  | 0.0   | 78.3 | 93.7  | 95.6   | 97.0    | 97.1  |
|                  | 8    | 2.8              | 1.3  | 0.3  | 0.1  | 0.0  | 0.0   | 2.9  | 82.8  | 94.6   | 96.3    | 94.7  |
|                  | 4    | 2.9              | 1.1  | 1.2  | 0.2  | 0.1  | 0.3   | 36.1 | 91.6  | 97.7   | 98.7    | 97.3  |
|                  | 2    | 2.9              | 1.1  | 0.4  | 0.3  | 0.6  | 0.5   | 77.0 | 95.6  | 98.5   | 99.5    | 97.5  |
|                  | 1    | 2.9              | 1.3  | 0.3  | 0.2  | 6.5  | 61.2  | 94.1 | 97.1  | 99.0   | 99.4    | 98.3  |
|                  | 0.5  | 3.1              | 1.0  | 0.3  | 2.0  | 77.9 | 96.6  | 98.1 | 99.3  | 100.8  | 101.5   | 100.1 |
|                  | 0.25 | 2.9              | 1.0  | 1.1  | 18.7 | 95.7 | 100.3 | 98.6 | 100.1 | 101.2  | 101.9   | 101.6 |
|                  | 0    | 96.9             | 93.4 | 93.0 | 95.9 | 97.9 | 99.2  | 98.3 | 99.8  | 100.4  | 100.3   | 100.0 |

  

|                  |      | Obatoclox (μM) |       |       |      |       |       |       |       |        |         |       |
|------------------|------|----------------|-------|-------|------|-------|-------|-------|-------|--------|---------|-------|
|                  |      | 80             | 40    | 20    | 10   | 5     | 2.5   | 1.25  | 0.625 | 0.3125 | 0.15625 | 0     |
| Colistin (μg/mL) | 16   | 17.7           | 2.9   | 1.2   | 0.5  | 0.2   | 0.0   | 0.1   | 100.4 | 97.1   | 94.9    | 94.9  |
|                  | 8    | 15.6           | 5.5   | 1.5   | 0.7  | 0.3   | 0.2   | 23.1  | 94.3  | 95.7   | 96.5    | 95.9  |
|                  | 4    | 26.6           | 3.6   | 1.9   | 1.2  | 0.7   | 0.6   | 79.2  | 98.6  | 98.3   | 98.6    | 99.3  |
|                  | 2    | 20.5           | 3.4   | 1.8   | 1.2  | 0.7   | 0.6   | 89.2  | 97.2  | 98.9   | 98.7    | 100.8 |
|                  | 1    | 10.3           | 3.0   | 1.8   | 0.9  | 0.4   | 71.4  | 99.7  | 100.2 | 102.1  | 102.1   | 103.0 |
|                  | 0.5  | 5.5            | 2.7   | 1.8   | 1.0  | 60.0  | 99.9  | 102.0 | 102.4 | 103.0  | 103.0   | 102.5 |
|                  | 0.25 | 6.3            | 2.5   | 1.9   | 77.7 | 101.2 | 104.0 | 101.6 | 102.1 | 103.2  | 103.1   | 103.4 |
|                  | 0    | 147.3          | 121.2 | 107.3 | 98.9 | 97.6  | 100.1 | 97.0  | 99.4  | 100.8  | 100.7   | 100.0 |

  

|                  |      | Rifampicin (μM) |      |      |      |      |      |       |        |         |          |          |       |
|------------------|------|-----------------|------|------|------|------|------|-------|--------|---------|----------|----------|-------|
|                  |      | 40              | 20   | 10   | 5    | 2.5  | 1.25 | 0.625 | 0.3125 | 0.15625 | 0.078125 | 0.039063 | 0     |
| Colistin (μg/ml) | 16   | 0.5             | 0.5  | 0.5  | 0.2  | 0.1  | 0.2  | 0.3   | 0.3    | 2.1     | 4.7      | 20.0     | 94.4  |
|                  | 8    | 0.5             | 0.7  | 0.6  | 0.3  | 0.1  | 0.3  | 0.3   | 1.0    | 3.3     | 7.7      | 41.1     | 93.0  |
|                  | 4    | 0.7             | 0.8  | 0.6  | 0.6  | 0.5  | 0.4  | 0.7   | 1.8    | 4.5     | 20.1     | 69.4     | 94.9  |
|                  | 2    | 0.8             | 1.0  | 0.7  | 0.7  | 0.5  | 0.5  | 1.1   | 25.4   | 45.1    | 81.0     | 90.3     | 98.1  |
|                  | 1    | 0.7             | 0.5  | 0.7  | 0.5  | 0.5  | 0.4  | 30.5  | 86.0   | 94.6    | 98.7     | 101.3    | 100.4 |
|                  | 0.5  | 0.7             | 0.7  | 0.6  | 41.9 | 61.9 | 82.8 | 95.5  | 100.3  | 102.6   | 102.9    | 102.9    | 103.0 |
|                  | 0.25 | 0.8             | 0.6  | 16.8 | 72.5 | 93.8 | 98.1 | 100.7 | 103.1  | 103.3   | 103.3    | 103.4    | 103.6 |
|                  | 0    | 0.8             | 14.6 | 60.5 | 85.0 | 99.6 | 98.2 | 96.8  | 95.6   | 99.0    | 98.9     | 100.3    | 100.0 |

  

|                  |      | Novobiocin (μM) |      |      |      |      |      |      |      |       |        |         |       |
|------------------|------|-----------------|------|------|------|------|------|------|------|-------|--------|---------|-------|
|                  |      | 160             | 80   | 40   | 20   | 10   | 5    | 2.5  | 1.25 | 0.625 | 0.3125 | 0.15625 | 0     |
| Colistin (μg/ml) | 16   | -0.1            | -0.1 | 0.1  | 1.4  | 2.5  | 4.4  | 6.8  | 11.8 | 18.2  | 14.8   | 44.3    | 92.7  |
|                  | 8    | 0.0             | 0.1  | 1.4  | 3.8  | 5.7  | 9.1  | 13.9 | 18.7 | 20.0  | 17.1   | 65.8    | 93.1  |
|                  | 4    | 0.2             | 1.7  | 3.6  | 6.2  | 9.1  | 17.0 | 18.3 | 19.7 | 18.4  | 21.9   | 85.5    | 95.6  |
|                  | 2    | 1.6             | 3.6  | 5.3  | 7.6  | 12.9 | 17.0 | 18.2 | 18.2 | 29.4  | 58.5   | 92.0    | 96.9  |
|                  | 1    | 3.8             | 5.7  | 6.3  | 10.5 | 15.0 | 17.6 | 17.0 | 32.1 | 37.0  | 94.5   | 98.8    | 100.0 |
|                  | 0.5  | 6.2             | 7.5  | 8.7  | 15.4 | 17.1 | 16.5 | 44.3 | 48.3 | 95.4  | 100.7  | 102.4   | 102.9 |
|                  | 0.25 | 7.8             | 10.2 | 12.9 | 18.6 | 18.0 | 51.4 | 63.8 | 89.8 | 100.9 | 102.1  | 103.2   | 103.3 |
|                  | 0    | 10.0            | 12.2 | 16.0 | 23.2 | 31.0 | 38.3 | 79.2 | 93.0 | 95.5  | 97.5   | 99.4    | 100.0 |

**Figure S2: Checkerboard assays for colistin with prodigiosin, obatoclox, rifampicin, or novobiocin in *K. pneumoniae* B9.** Cells in black indicate < 10% growth compared to the untreated control well as determined by OD600 measured on a Synergy HTX Multimode plate reader

**Table S8: Fractional inhibitory concentration indices (FICI) for antibiotic/adjuvant combination in *A. baumannii* 4106 and *K. pneumoniae* B9.**

|                                             | <i>A. baumannii</i> 4106 |       | <i>K. pneumoniae</i> B9 |      |
|---------------------------------------------|--------------------------|-------|-------------------------|------|
| Prodigiosin Concentration ( $\mu\text{M}$ ) | 5                        | 10    | 2.5                     | 5    |
| Prodigiosin MIC ( $\mu\text{M}$ )           | 20                       | 20    | 160                     | 160  |
| Colistin Concentration ( $\mu\text{g/mL}$ ) | 8                        | 0.5   | 2                       | 1    |
| Colistin MIC ( $\mu\text{g/mL}$ )           | 1024                     | 1024  | 512                     | 512  |
| FICI                                        | 0.26                     | 0.50  | 0.02                    | 0.03 |
| Obatoclox Concentration ( $\mu\text{M}$ )   | 5                        | 10    | 2.5                     | 5    |
| Obatoclox MIC ( $\mu\text{M}$ )             | 160                      | 160   | 160                     | 160  |
| Colistin Concentration ( $\mu\text{g/mL}$ ) | 8                        | 4     | 2                       | 1    |
| Colistin MIC ( $\mu\text{g/mL}$ )           | 1024                     | 1024  | 512                     | 512  |
| FICI                                        | 0.04                     | 0.07  | 0.02                    | 0.03 |
| Rifampicin Concentration ( $\mu\text{M}$ )  | 0.625                    | 0.625 | 0.625                   | 1.25 |
| Rifampicin MIC ( $\mu\text{M}$ )            | 2.5                      | 2.5   | 40                      | 40.0 |
| Colistin Concentration ( $\mu\text{g/mL}$ ) | 2                        | 1     | 2.0                     | 1    |
| Colistin MIC ( $\mu\text{g/mL}$ )           | 1024                     | 1024  | 512                     | 512  |
| FICI                                        | 0.25                     | 0.25  | 0.02                    | 0.03 |
| Novobiocin Concentration ( $\mu\text{M}$ )  | 2.5                      | 5     | 2.5                     | 5    |
| Novobiocin MIC ( $\mu\text{M}$ )            | 20                       | 20    | 160                     | 160  |
| Colistin Concentration ( $\mu\text{g/mL}$ ) | 4                        | 1     | 16                      | 8    |
| Colistin MIC ( $\mu\text{g/mL}$ )           | 1024                     | 1024  | 512                     | 512  |
| FICI                                        | 0.13                     | 0.25  | 0.05                    | 0.05 |

Two lowest combinations for each condition reported. Cells highlighted in yellow indicate synergy; cell highlighted in red indicates indifference.

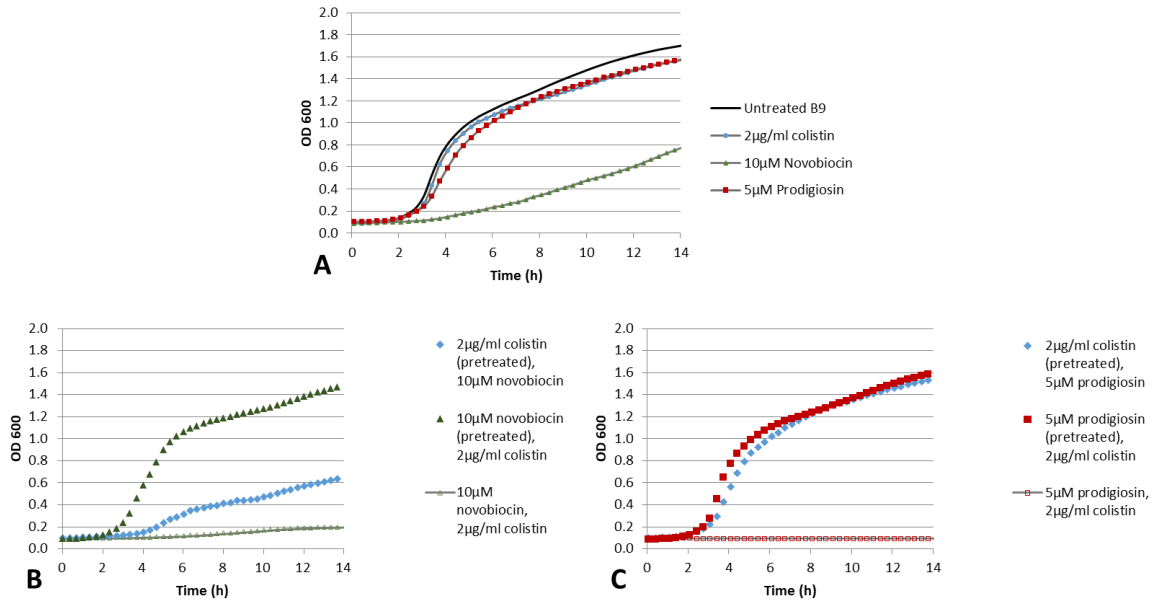

**Figure S3: Growth curves of *Klebsiella pneumoniae* B9.** (A) Growth of untreated B9 and B9 treated for 14 hours with 2 µg/mL colistin (MIC 512 µg/mL), 10 µM novobiocin (MIC 20 µM), or 5 µM prodigiosin (MIC > 160 µM). (B) Growth of B9 pretreated with either 2 µg/mL colistin, then treated for 14 hours with 10 µM novobiocin; B9 pretreated with 10 µM novobiocin, then treated for 14 hours with 2 µg/mL colistin; and B9 treated with colistin and novobiocin concurrently. Novobiocin at 10 µM causes growth delays, but pretreated with either antibiotic does not restore lack of growth seen with both compounds. (C) Growth of B9 pretreated with either 2 µg/mL colistin, then treated for 14 hours with 5 µM prodigiosin; B9 pretreated with 5 µM prodigiosin, then treated for 14 hours with 2 µg/mL colistin; and B9 treated with colistin and prodigiosin concurrently. Pretreatment with either compound has no major effect on growth.

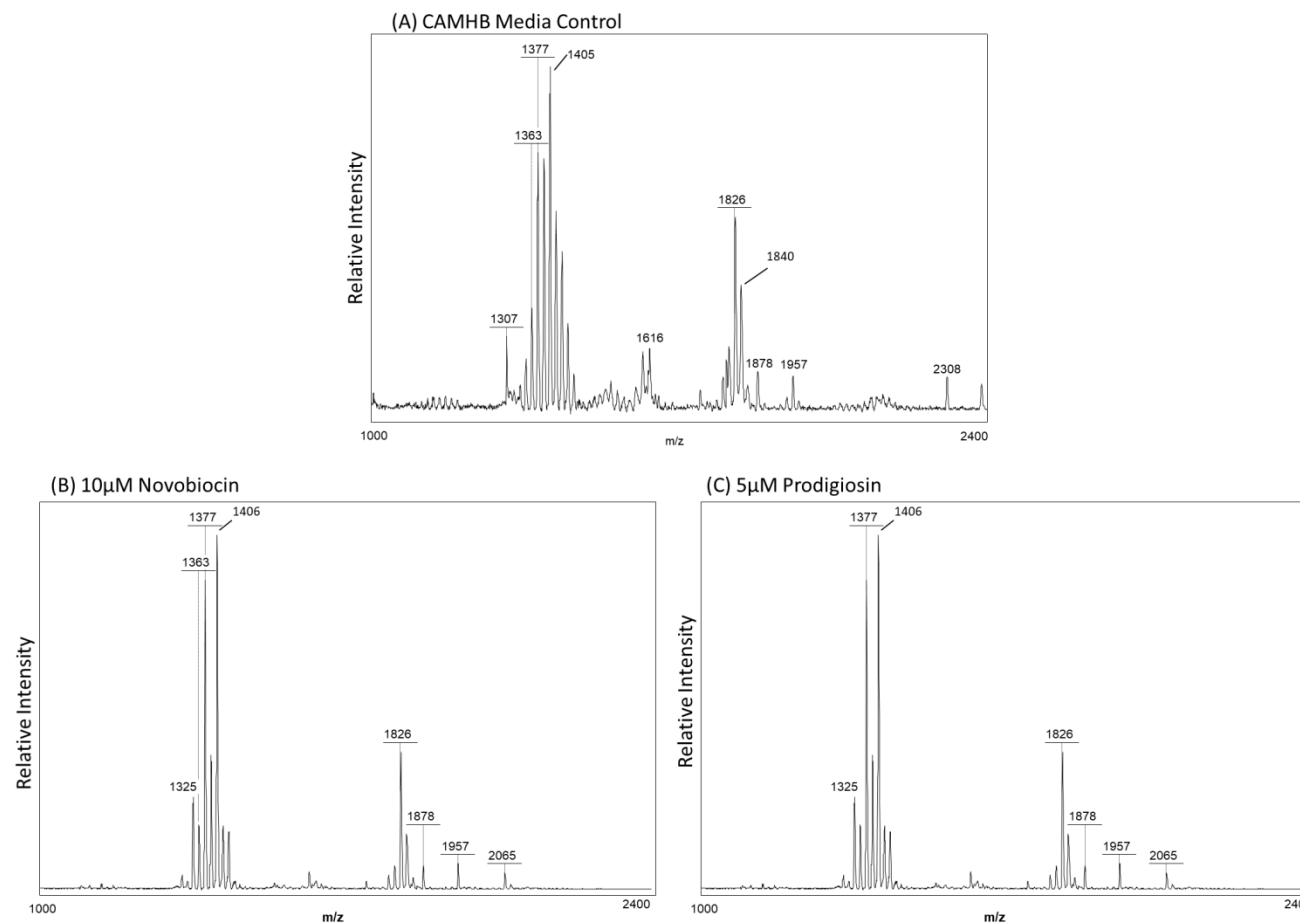

**Figure S4: m/z shifts in lipid A composition of an untreated *K. pneumoniae* B9 control (A) compared to cells treated with 10 µM novobiocin (B) or 5 µM prodigiosin (C).** The peak at 1826 is representative of *K. pneumoniae*. There is no indication of major changes in modifications to lipid A upon treatment with either compound. Enrichment with C16 palmitate is indicated by m/z shift ~ 238. Data is representative of 2 biologically independent samples.



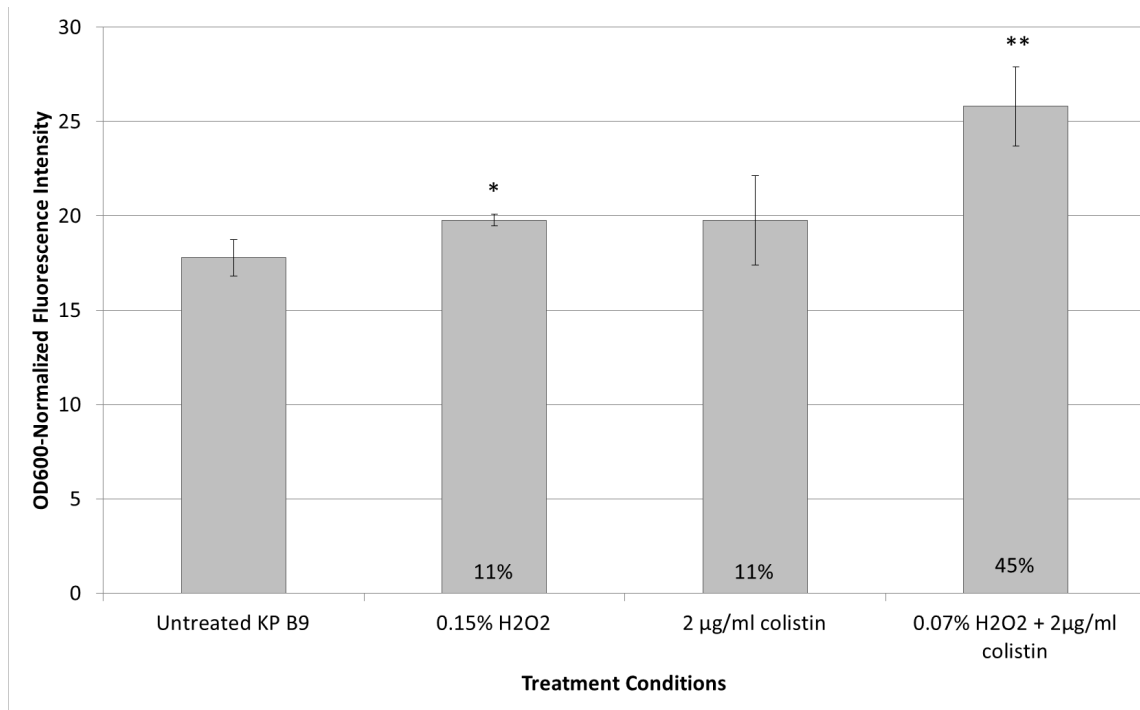

**Figure S5: DCFH-DA fluorescence assay of *K. pneumoniae* B9 cells treated with hydrogen peroxide and colistin.** Combination of hydrogen peroxide and colistin results in an increase in ROS fluorescence, but on a much smaller scale than prodigiosin and colistin. Data are representative of 5 fluorescence measurements in 6 independent biological samples all conducted on the same day. Note: the increase in ROS fluorescence with hydrogen peroxide was highly variable, depending on the day. Increases could range from the 11% increase shown here to 1050%. \* p-value < 0.05 \*\*p-value < 0.001
